# Supplementary material for: Oncolytic adenovirus coding for bispecific T cell engager against human MUC-1 potentiates T cell response against solid tumors
Source: PubMed Central journal article supplement — Mol Ther Oncolytics. 2022 Dec 28;28:59–73. doi: 10.1016/j.omto.2022.12.007 (PMC9842968; doi:10.1016/j.omto.2022.12.007), 2022-12-28
Supplement: mmc1.pdf [file mmc1.pdf]

**Supplemental information**

**Oncolytic adenovirus coding for bispecific T cell engager against human MUC-1 potentiates T cell response against solid tumors**

**Saru Basnet, Joao M. Santos, Dafne C.A. Quixabeira, James H.A. Clubb, Susanna A.M. Grönberg-Vähä-Koskela, Victor Arias, Santeri Pakola, Tatiana V. Kudling, Camilla Heiniö, Riikka Havunen, Victor Cervera-Carrascon, Suvi Sorsa, Marjukka Anttila, Anna Kanerva, and Akseli Hemminki**

**Table S1. List of antibodies used in this study.**

| Experiment                                                             | Antibodies                                                                                                                                                                                                                                                                                    | Manufacturer               |
|------------------------------------------------------------------------|-----------------------------------------------------------------------------------------------------------------------------------------------------------------------------------------------------------------------------------------------------------------------------------------------|----------------------------|
| Expression of cell surface antigens                                    | APC anti- human MUC1 (clone 16A)<br>FITC anti- human CD3 (clone SK7)                                                                                                                                                                                                                          | Biolegend, California, USA |
| Binding assay                                                          | Anti-human MUC1 (clone HMFG2)                                                                                                                                                                                                                                                                 | Merck, New Jersey, USA     |
| T cell activation and proliferation assay                              | PE-CF594 anti-human CD3 (clone UCHT1)<br>PE anti-human CD4 (clone RPA-T4)<br>FITC anti-human CD8 (clone RPA-T8)<br>PE-Cy <sup>TM</sup> 7 anti-human CD69 (clone FN50)<br>PE-Cy <sup>TM</sup> 5 anti-human CD25 (clone M-A251)                                                                 | BioLegend, California, USA |
| Analysis of immune cells populations from <i>in vivo</i> tumor samples | FITC anti-human CD3 (clone, OKT3)<br>AF700 anti-human CD4 (clone, A161A1)<br>BV421 anti-human CD8 (clone, SK1)<br>PE-Cy <sup>TM</sup> 7 anti-human CD69 (clone, 17A2)<br>APC anti-human CD56 (clone, FN50)<br>PE anti-human TIM3 (clone, F38-2E2)<br>PE-CF594 anti-human PD-1 (clone, NAT105) | BioLegend, California, USA |

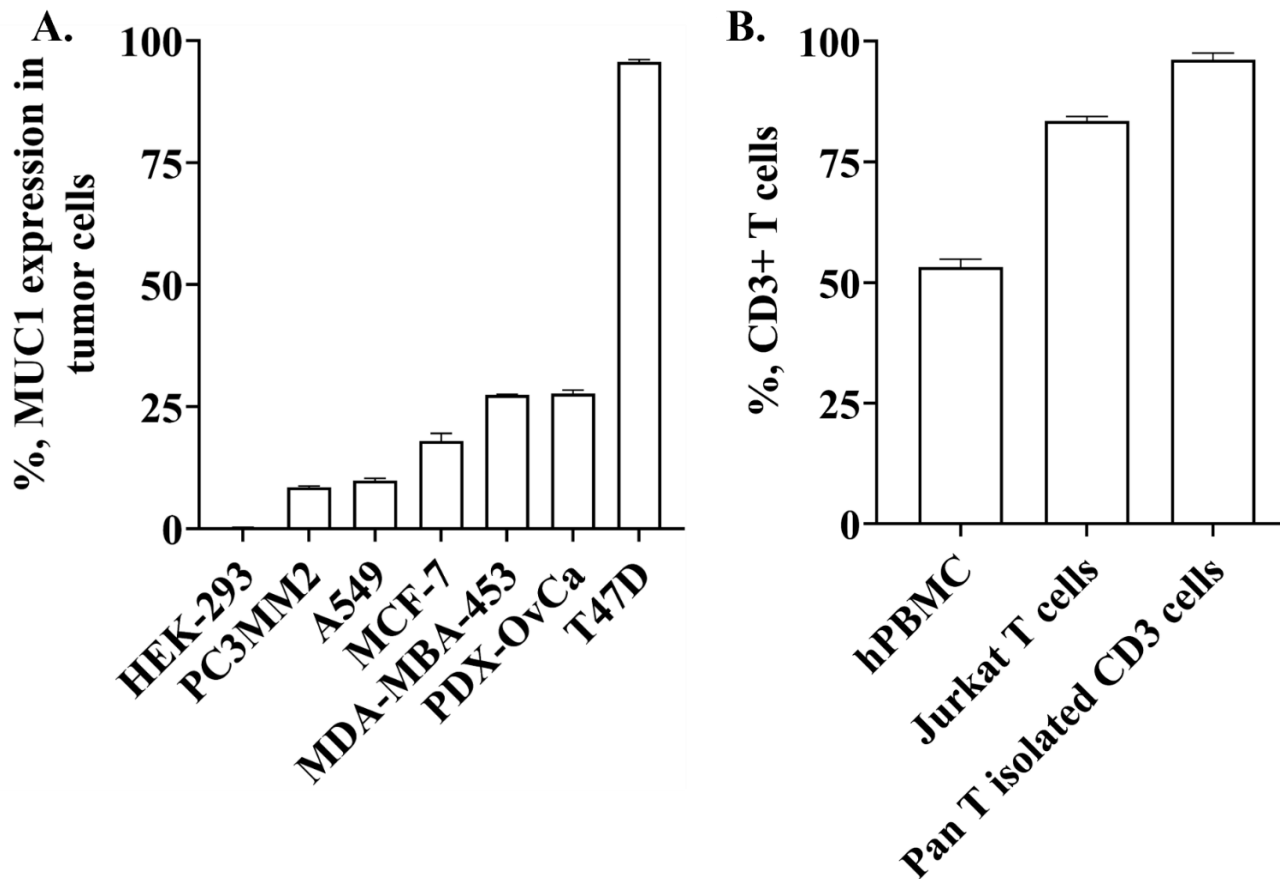

**Figure S1. Expression of cell surface antigen from different cells. (A)** MUC1 expression in a panel of different cell lines. **(B)** Expression of CD3 T cells in different cell lines used in this study.

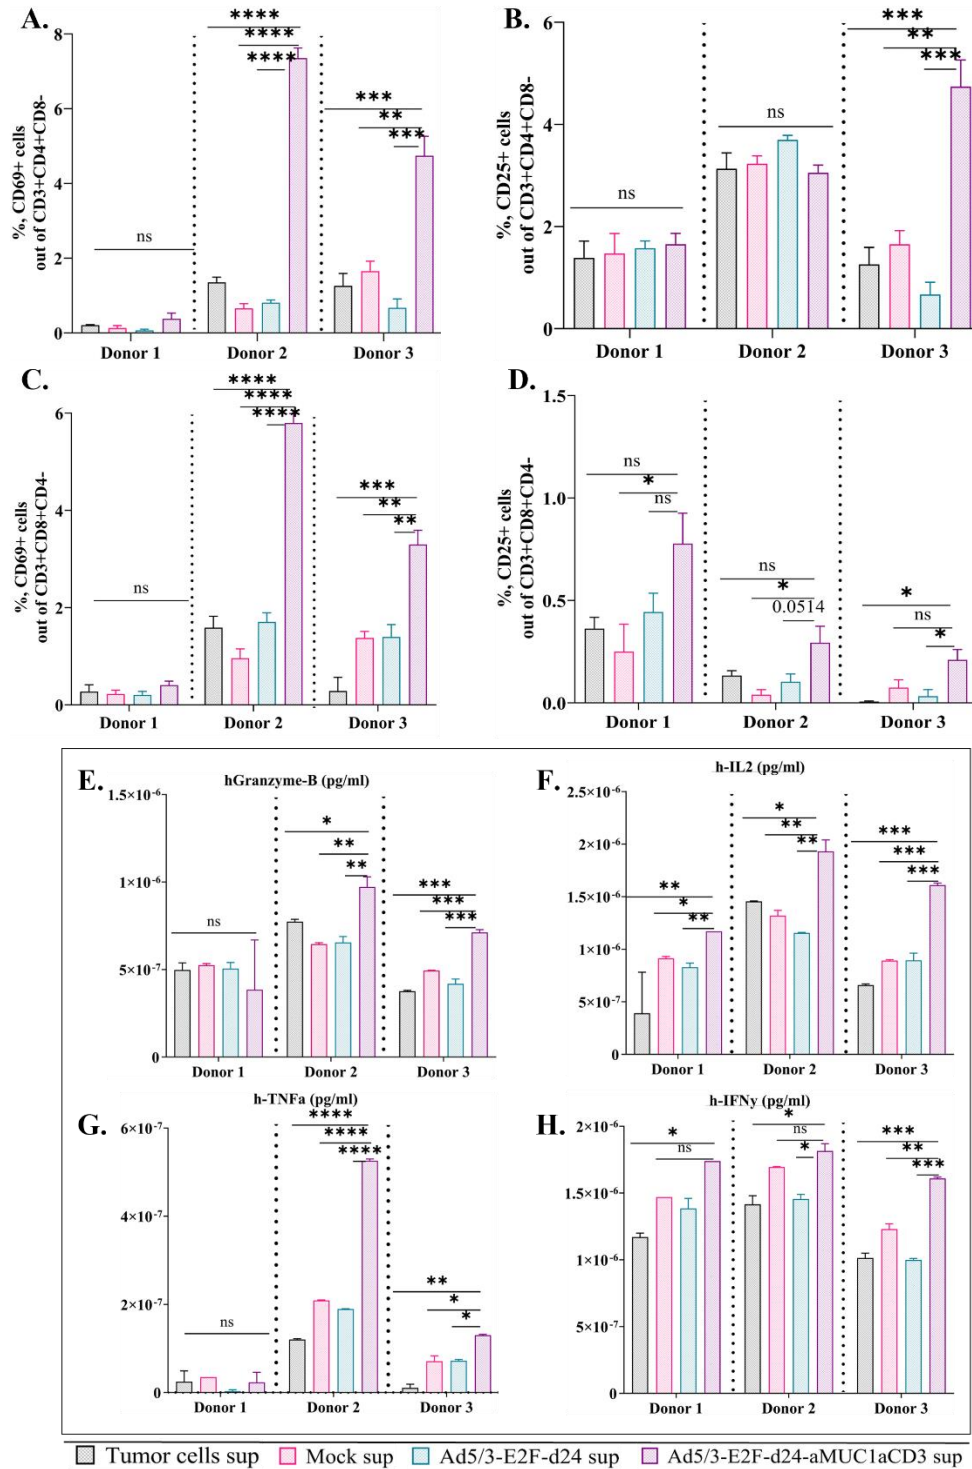

**Figure S2. TILT-321 virus-derived aMUC1aCD3-BsTe functionality in T cells from three different healthy donors.** (A-D) Isolated T cells were incubated with Ad5/3-E2F-d24 and Ad5/3-E2F-d24-aMUC1aCD3 supernatants. Uninfected (Mock) supernatants were used a negative control. 3 days after coculture, CD3+CD4+CD69+ or CD3+CD4+CD25+ and CD3+CD8+CD69+ or CD3+CD8+CD25+ T cells activation was assessed by flow cytometry. Cytokine concentrations in culture supernatants (E) GranzymeB, (F) IL2, (G) TNFa and (H) IFN $\gamma$  were quantified using a cytometric bead array. The mean

± SEM of quadruplets is shown. Statistical significance is represented as \*p<0.05, \*\*p<0.01, \*\*\*p<0.001, and \*\*\*\*p<0.0001.

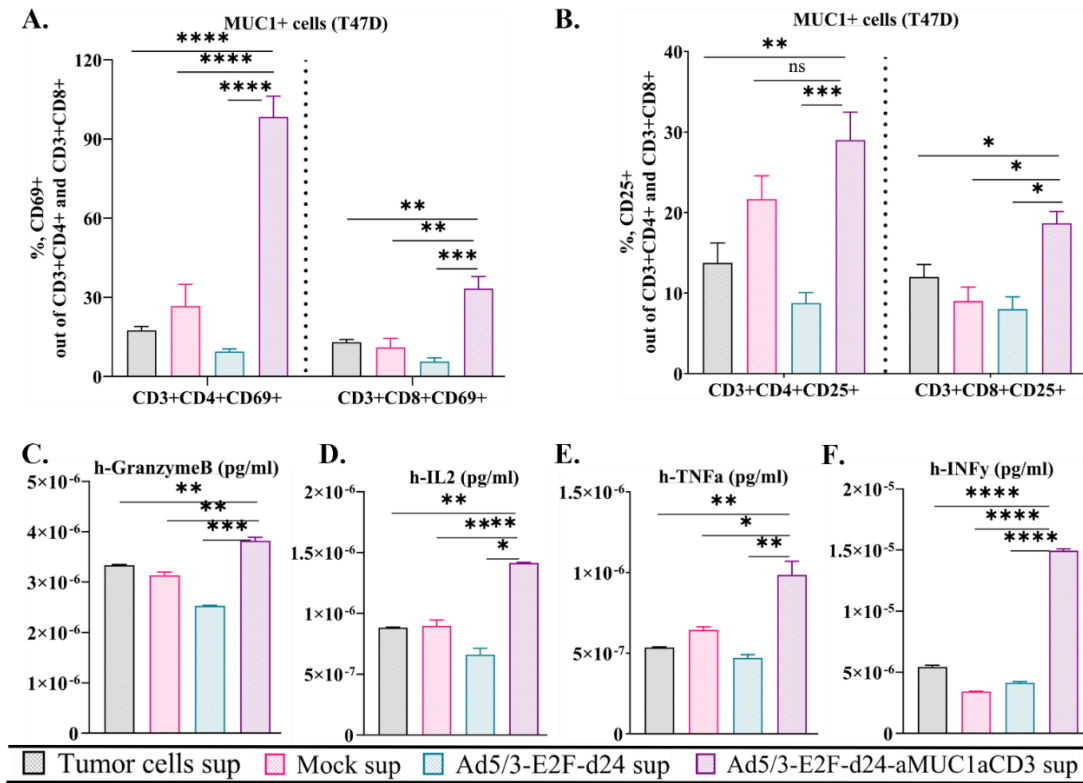

**Figure S3. *In vitro* characterization of virally released aMUC1aCD3-BsTe.** Ad5/3-E2F-d24-aMUC1aCD3-derived supernatant containing aMUC1aCD3-BsTe was added to cultures of MUC1 positive T47D cells monolayer in the presence of unstimulated T cell at ratio of T: E= 5. Uninfected supernatant was used as a Mock. Total percentage of activated T cells (A) CD3+CD4+CD69+ or CD3+CD4+CD25+ and, (B) CD3+CD8+CD69+ or CD3+CD8+CD25+ that are cytotoxic for MUC1+ tumor cells. The supernatants harvested after 72 hours of co-cultures were analyzed for (C) GranzymeB, (D) IL2, (E) TNFα and (F) IFNγ using BD FACS Array bioanalyzer by Flow cytometry. The mean ± SEM of quadruplets is shown. Statistical significance is represented as \*p<0.05, \*\*p<0.01, \*\*\*p<0.001, and \*\*\*\*p<0.0001.

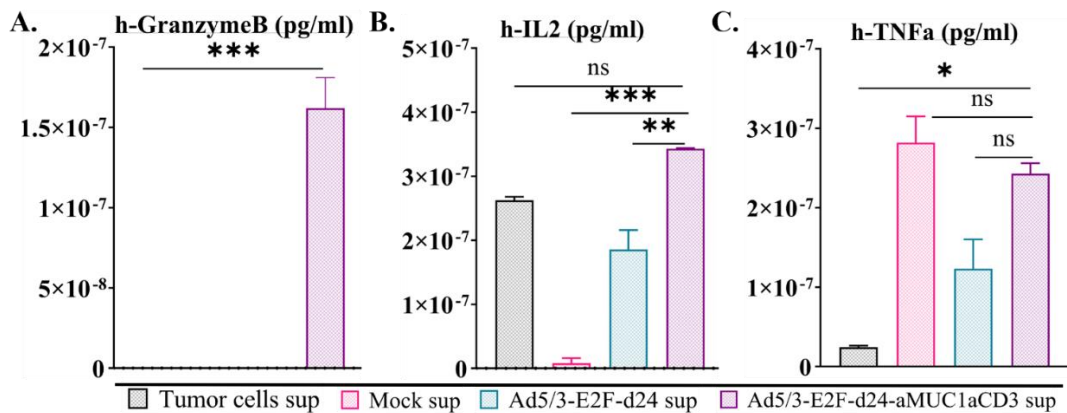

**Figure S4. Evaluation of cytokine expression produced by proliferated T cells (CFSE stained).** Supernatants were analyzed for (A) GranzymeB, (B) IL2 and, (C) TNFa by Flow cytometry.

The mean  $\pm$  SEM of duplicates is shown. Statistical significance is represented as \* $p < 0.05$ , \*\* $p < 0.01$ , and \*\*\* $p < 0.001$ .

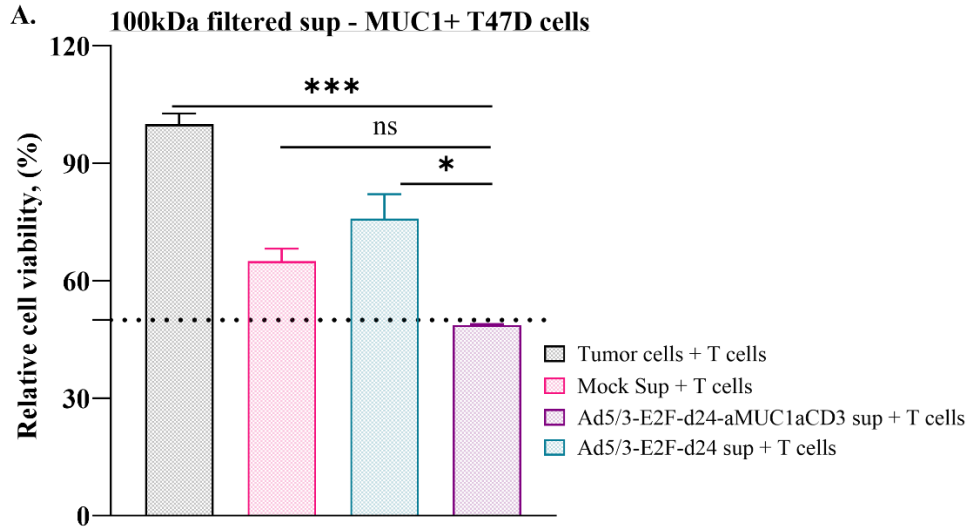

**Figure S5. Cytotoxicity of virus-derived aMUC1aCD3 in co-cultures of T cells with MUC1+ tumor cells using 100 kDa filtered supernatant.** (A) Ad5/3-E2F-d24-aMUC1aCD3-derived supernatant containing aMUC1aCD3-BsTe was added to cultures of MUC1 positive T47D cells monolayer in the presence of unstimulated T cell at T: E = 5. Uninfected supernatant is used as a Mock.

The mean  $\pm$  SEM of triplicates is shown. Statistical significance is represented as \* $p < 0.05$  and \*\*\* $p < 0.001$ .

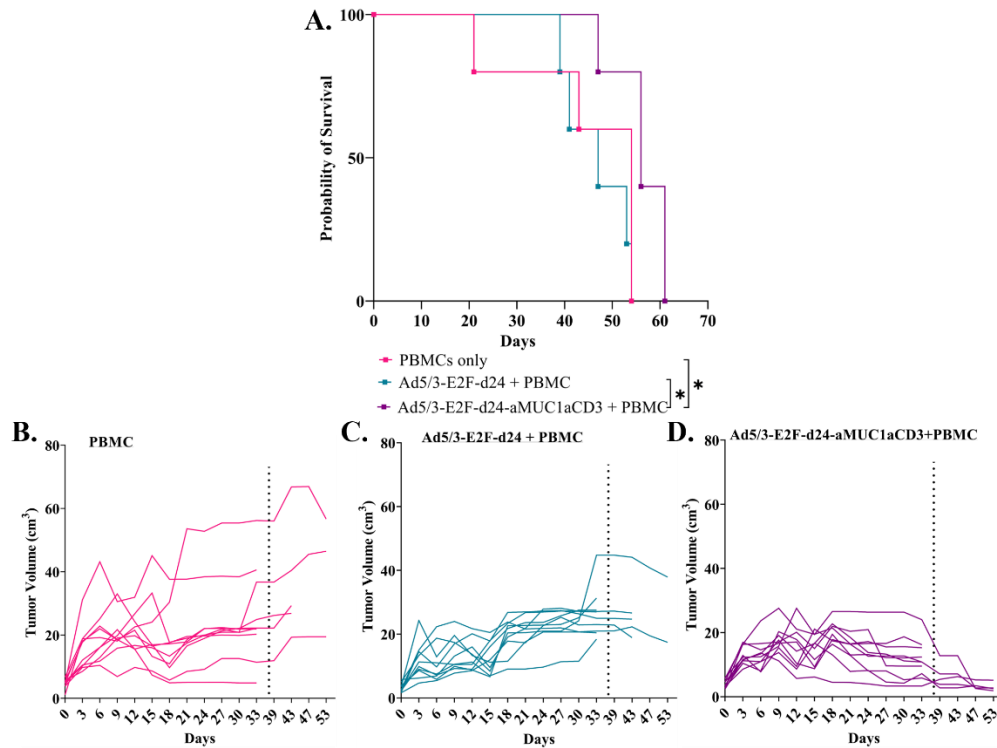

**Figure S6. Probability of survival and Individual tumor growth curve of A549 humanized xenograft mice.** (A) Ad5/3-E2F-d24-aMUC1aCD3+PBMC showed significantly better survival compared to Ad5/3-E2F-d24+PBMC and PBMC control group. Individual tumor growth of (B) PBMC (C) Ad5/3-E2F-d24+PBMC (D) Ad5/3-E2F-d24-aMUC1aCD3+PBMC treated mice. Dashed line is indicating the time point (day 35) for tumor sample collection from mice (n = 5).

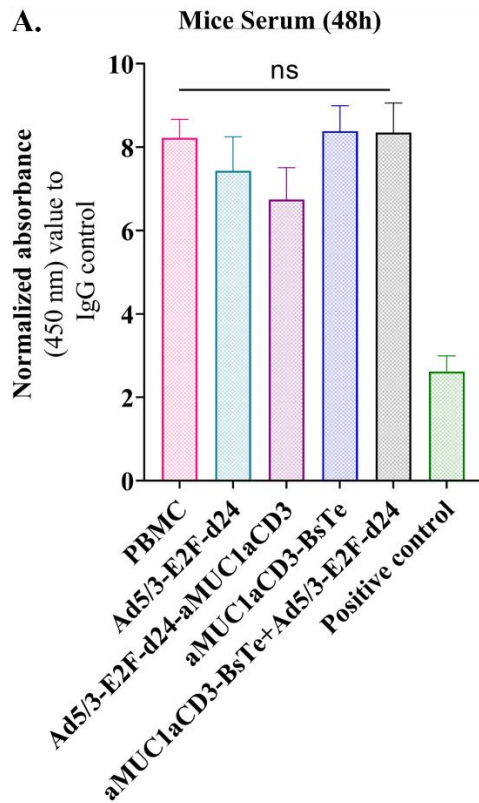

**Figure S7. aMUC1aCD3-BsTe expression in serum sample collected from PDX-OvCa bearing mice.** (A) Competitive binding In-cell ELISA was used to analyze the binding of aMUC1aCD3-BsTe to its target MUC1 antigen expressed by T47D cell monolayer. TILT-321 infected 30 kDa filtered cells supernatant was used as a positive control.
